# Supplementary material for: The Impact of MicroRNA-133a on Prognosis and Clinicopathological Parameters for Digestive System Cancers: a Comprehensive Study Based on Meta-Analysis and TCGA Database
Source: Springer Nature journal article supplement (doi:10.1007/s12253-019-00619-y), 2019-02-27
Supplement: MOESM2 [file 16513736]

**Supplementary Table S1.** Theclinical parameters data and quality scores of the included studies.

| First author | Publication Year | Country | Cancer Type | Gender | | | | Tumor Differentiation | | | | Lymph node metastasis | | | | TNM stage | | | | NOS |
| --- | --- | --- | --- | --- | --- | --- | --- | --- | --- | --- | --- | --- | --- | --- | --- | --- | --- | --- | --- | --- |
| High Expression | | Low Expression | | High Expression | | Low Expression | | High Expression | | Low Expression | | High Expression | | Low Expression | |
| Male | Female | Male | Female | Well /moderate | Poor | Well /moderate | Poor | Positive | Negative | Positive | Negative | III–IV | I–II | III–IV | I–II |
| Chen G[[1](#_ENREF_1)] | 2014 | China | ESCC | 25 | 11 | 32 | 14 | 26 | 10 | 11 | 35 | / | / | / | / | 28 | 8 | 43 | 3 | 7 |
| Qin Y[[2](#_ENREF_2)] | 2014 | China | Pancreatic cancer | 19 | 28 | 21 | 27 | 32 | 15 | 30 | 18 | 20 | 27 | 40 | 8 | 0 | 47 | 0 | 48 | 7 |
| Zhang W[[3](#_ENREF_3)] | 2015 | China | HCC | 11 | 11 | 13 | 5 | 20 | 2 | 10 | 8 | 1 | 21 | 13 | 5 | 1 | 21 | 11 | 7 | 7 |
| Gao SH[[4](#_ENREF_4)] | 2016 | China | ESCC | 44 | 18 | 41 | 23 | 49 | 13 | 48 | 16 | 51 | 11 | 56 | 8 | 36 | 26 | 33 | 31 | 7 |

Abbreviation: NOS, the scores of Newcastle-Ottawa quality assessment scale; ESCC, esophageal squamous cell carcinoma; HCC, hepatocellular cancer.

[1] Chen G, Peng J, Zhu W, Tao G, Song Y, Zhou X, et al. Combined downregulation of microRNA-133a and microRNA-133b predicts chemosensitivity of patients with esophageal squamous cell carcinoma undergoing paclitaxel-based chemotherapy. Medical oncology (Northwood, London, England). 2014;31:263.

[2] Qin Y, Dang X, Li W, Ma Q. miR-133a functions as a tumor suppressor and directly targets FSCN1 in pancreatic cancer. Oncology research. 2013;21:353-63.

[3] Zhang W, Liu K, Liu S, Ji B, Wang Y, Liu Y. MicroRNA-133a functions as a tumor suppressor by targeting IGF-1R in hepatocellular carcinoma. Tumour biology : the journal of the International Society for Oncodevelopmental Biology and Medicine. 2015;36:9779-88.

[4] Gao SH, Liu J, Zhang HJ, Zhao N, Zhang J. Low miR-133a expression is a predictor of outcome in patients with esophageal squamous cell cancer. European review for medical and pharmacological sciences. 2016;20:3788-92.
